# Supplementary material
Source: Research Square preprint supplement (doi:10.21203/rs.3.rs-9968974/v1)
Supplement: Supplementary file 1 [file 1ccb1615f5f8d46e84c2834a.docx]

**Supplementary figure legends**

**Figure S1. Identification of meningeal Treg.** Representative flow cytometry gating strategy for the identification of meningeal Tregs. Meningeal cells were gated sequentially on live CD45⁺ cells, then CD4⁺ T cells, and Tregs were identified as CD25⁺Foxp3⁺ cells. Representative plots from CtrlF1 mice are shown.

**Figure S2: Maternal immune activation during pregnancy induces methylomic changes in offspring Tregs.** Methylomic analysis of splenic Tregs from CtrlF1 or MIAF1. (A) Volcano plot of differentially methylated region; (B) Heatmap of differentially methylated regions and (C) principal component analysis. Red indicates hypermethylated regions; green indicates hypomethylated regions compared to CtrlF1. *(n = 4 per group)*

**Figure S3: Quality control of meningeal CD45+ single-cell RNA sequencing.** (A) Proportion of mitochondrial gene content per cell in different conditions. (B) Number of genes detected per cell within each condition. (C) Number of unique molecular identifiers (UMIs) per cell across conditions. (D) Scatter plot showing the correlation between mitochondrial gene content (%) and the number of UMIs per cell, with individual cells represented as dots and color-coded by condition. (E) Scatter plot showing the correlation between the number of genes detected per cell and the number of UMIs, with individual cells represented as points and color-coded by condition.

**Figure S4: Maternal immune activation induces cerebral volume dispersion and is reversed by IL-2LD** (A) Region of interest analysis pipeline. T2w-MRI was used to construct a study template (arrow 1, ANTs10). T2w-MRI and study template were skull stripped (arrows 2, SPM segment12). Individual MRIs are then registered to the study template (arrow 3, ANTs), which is registered to the AIDA (arrow 4, ANTs). Finally, the transformations are inverted and applied to the AIDA atlas to obtain the brain regions in the native space of each mouse. (B) Bar plot of the distribution of volume across conditions. ACA, anterior cingulate area; AI, agranular insula area; CM, claustrum; ECT, ectorhinal area; GU, gustatory area; HY, hypothalamus; PERI, perirhinal area; sAMY, striatum-like amygdalar nuclei; STRd, striatum dorsal area; VIS, visceral area. Statistical analysis, t-test. *P < 0.05, **P < 0.01, ***P < 0.001, ****P < 0.0001. Results are expressed as mean +/- SEM.

**Figure S5: Low-dose IL-2 and empty AAVs injection do not alter behavior in control mice.** A) Percentage of buried marbles for Ctrl F1**-AAVE** (n = 21, 4 experiments), CtrlF1—**AAVIL2** (n = 15, 4 experiments) (B) Social preference index for Ctrl F1**-AAVE** (n = 16, 4 experiments), CtrlF1—**AAVIL2** (n = 15, 4 experiments). (C to E) Live mouse tracker behavioral profiles for CtrlF1—**AAVIL2** (n = 12), normalized to CtrlF1—**AAVe** (n = 12 per condition) over 14 h of free interactions, showing position in contact (C), social configuration (D) and social approach (E). Statistical analysis, t-test. *P < 0.05, **P < 0.01, ***P < 0.001, ****P < 0.0001. Results are expressed as mean +/- SEM. CtrlF1-AAVE: CtrlF1 with empty control AAV injected at postnatal W3; CtrlF1-AAVIL2: CtrlF1 with IL-2 producing AAV injected at postnatal W3.

**Figure S6: Maternal immune activation methodology** (A) Schematic of the experimental design. At E12.5, pregnant mothers were injected intraperitoneally with PBS (for Ctrl) or poly(I:C) (for MIA). (B) Three hours after the injection of poly(I:C), the efficacy of MIA was verified by measuring the level of IL-17a in maternal serum.

**Supplementary Table 1: Clinical evolution of the two ASD children with an history of maternal immune activation during pregnancy over 6 months of low-dose IL-2 treatment, as assessed by standardized scales.**

The table summarizes the longitudinal changes observed in both patients at baseline and after 6 months of low-dose IL-2 treatment using two standardized instruments (i) SRS-2 (Social Responsiveness Scale, 2nd edition): a quantitative questionnaire that measures the severity of autistic symptoms across social awareness, social cognition, social communication, social motivation, and restricted interests/repetitive behaviors, with higher scores indicating more severe impairment (ii) ADOS-2 (Autism Diagnostic Observation Schedule): a semi-structured standardized assessment that directly observes and codes social interaction, communication, play, and imaginative use of materials to evaluate autism-related behaviors across different modules adapted to age and language level (iii) the Vineland Adaptive Behavior Scales, Second Edition (VABS-2), a caregiver interview assessing adaptive functioning in the domains of communication, socialization, and daily living skills with sub scores. MIA: Maternal immune activation
