# Supplementary material
Source: Research Square preprint supplement (doi:10.21203/rs.3.rs-9968974/v1)
Supplement: Supplementary file 2 [file d2bd4de473b562d33390364c.xlsx]

## Sheet: Feuil1
		Patient 1	Patient 2
	Age at treatment initiation	12 years 4 months	8 years 1 months
Clinical informations	Type of MIA	Toxoplasmosis during the second trimester	Several SLE flares during pregnancy
	Diagnosis (DSM-5)	Autism spectrum disorders (F84) with intellectual disability (F72)	Autism spectrum disorders (F84) with intellectual disability (F72)
	M0	80	72
SRS (T-score)	M3	73	65
	M6	66	52
	M0	16	17
ADOS-2 (total score)	M3	15	11
	M6	12	12
	M0	6	6
ADOS-2 (total score)	M3	5	4
	M6	4	4
	M0	5	8
VABS-2 Total communication	M3	7	11
	M6	9	16
	M0	29	29
VABS-2 Communication Expressive Subscore	M3	22	29
	M6	27	43
	M0	21	19
VABS-2 communication Receptive subscore	M3	24	23
	M6	27	33
	M0	11	18
VABS-2 communication Written subscore	M3	11	18
	M6	12	16
	M0	3	5
VABS-2 Total socialization	M3	3	7
	M6	4	12
	M0	14	13
VABS-2 socialization Coping Subscore	M3	13	17
	M6	20	24
	M0	22	25
VABS-2 socialization Interpersonal relationship subscore	M3	31	24
	M6	34	39
	M0	9	12
VABS-2 socialization Play subscore	M3	18	12
	M6	24	23
