# Supplementary material
Source: Research Square preprint supplement (doi:10.21203/rs.3.rs-9968974/v1)

A.

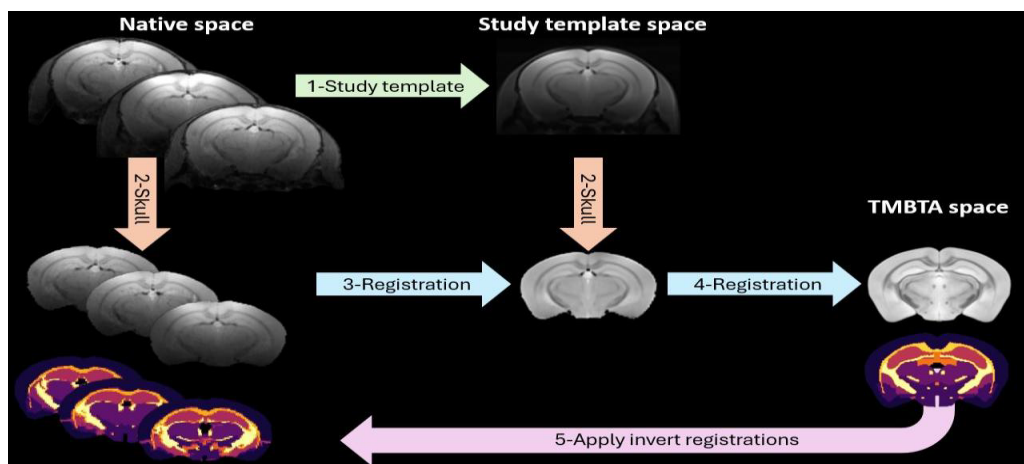

B.

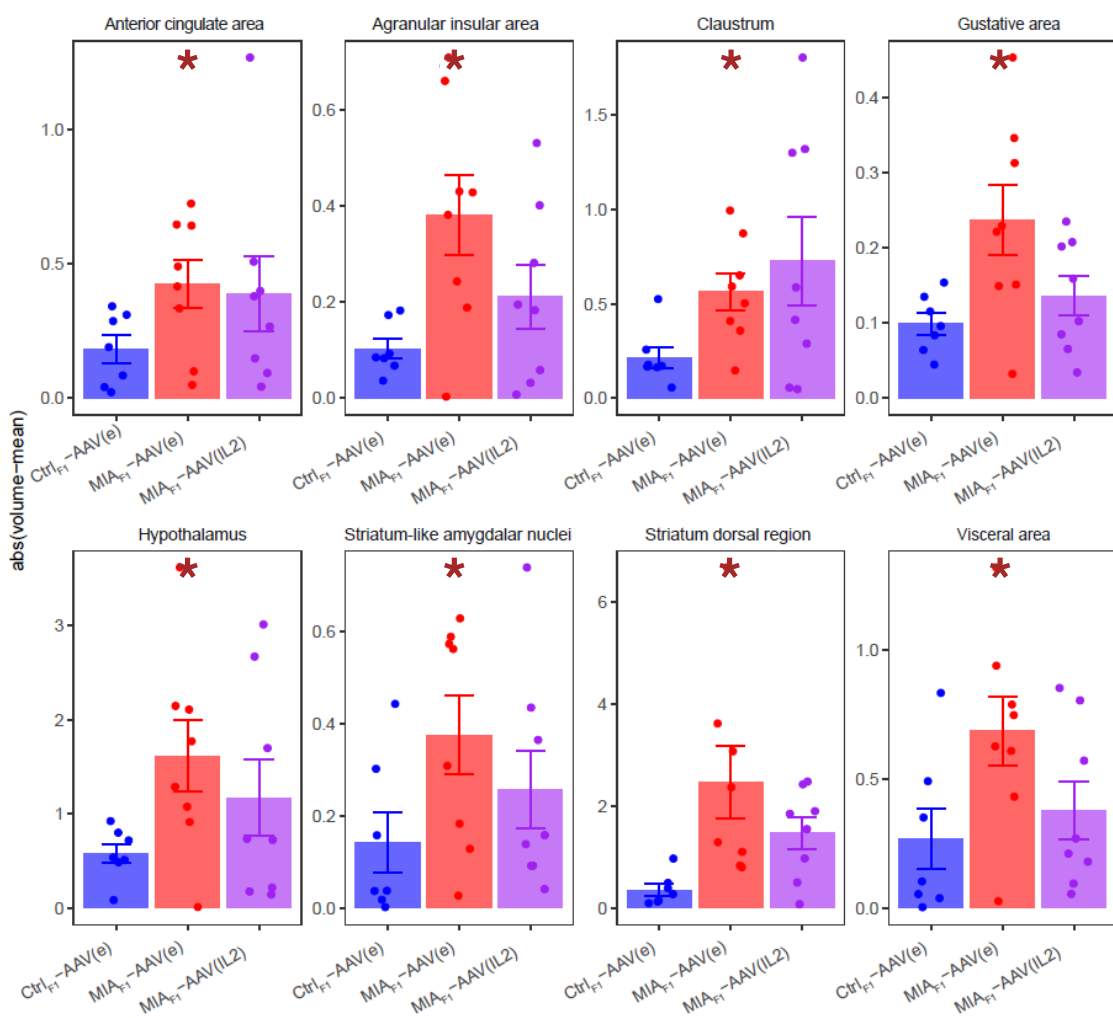

Supplement: Supplementary file 2 [file 485852fdb539256fecb81f97.pdf]

**A**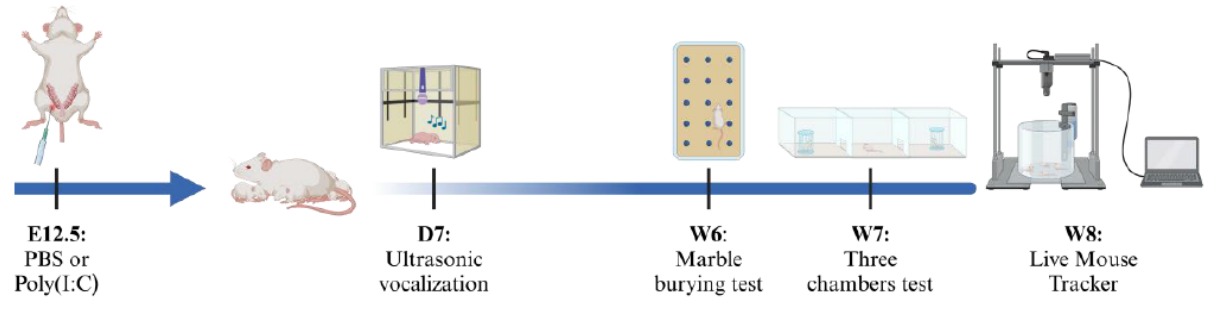**B**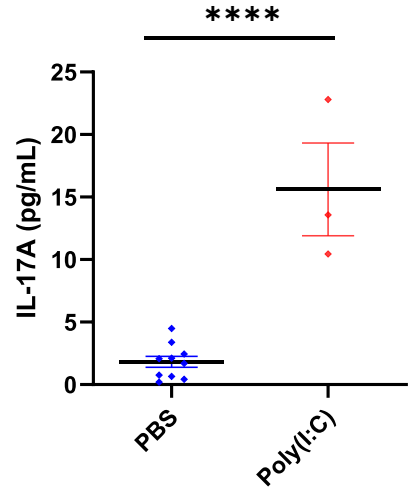

Supplement: Supplementary file 3 [file 5fc00761741f0973db892d5e.pdf]

**A**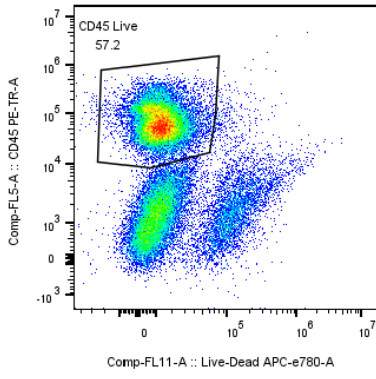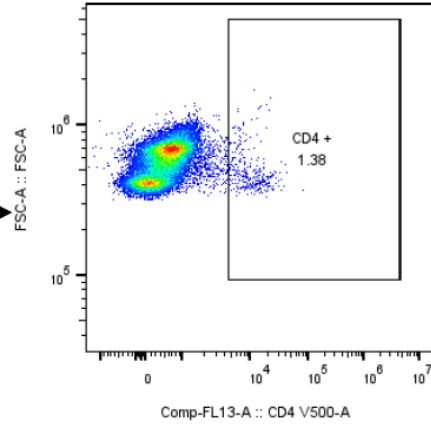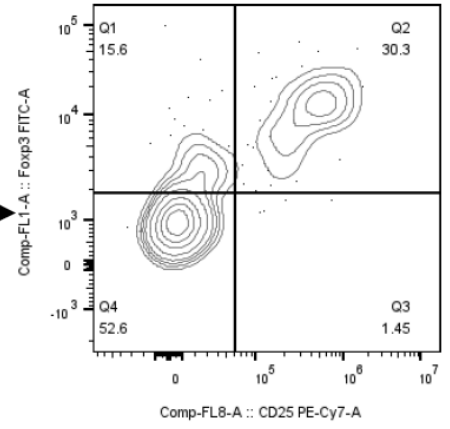

Supplement: Supplementary file 4 [file 97787f20d8568e8ac95c3ab7.pdf]

A

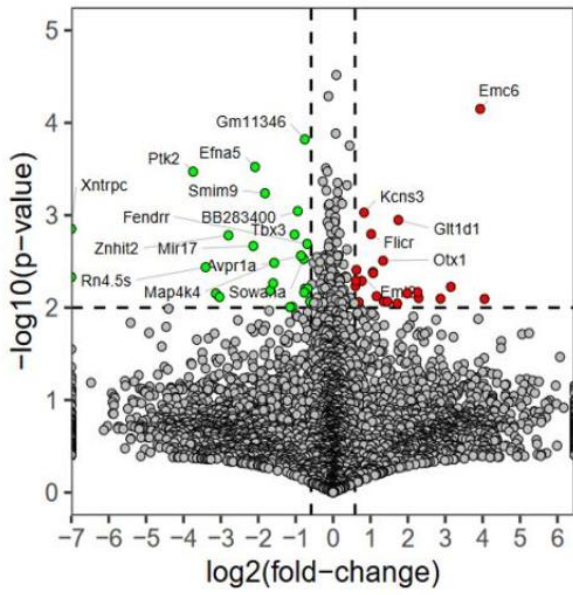

B

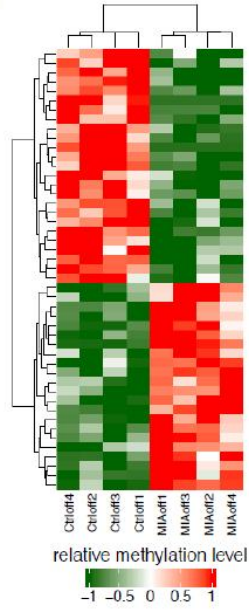

C

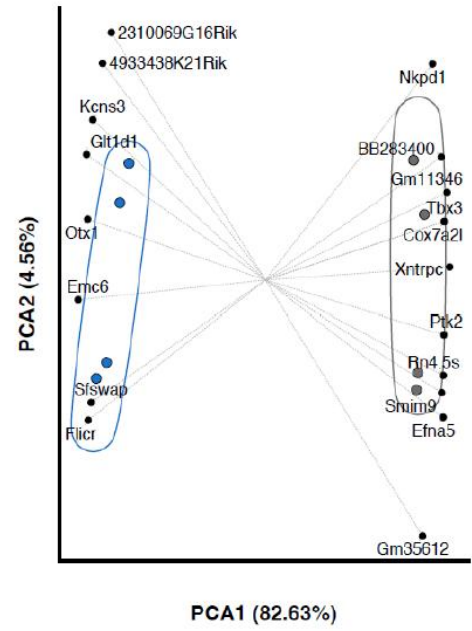

Supplement: Supplementary file 5 [file cf5255d871626aeba333a757.pdf]

A

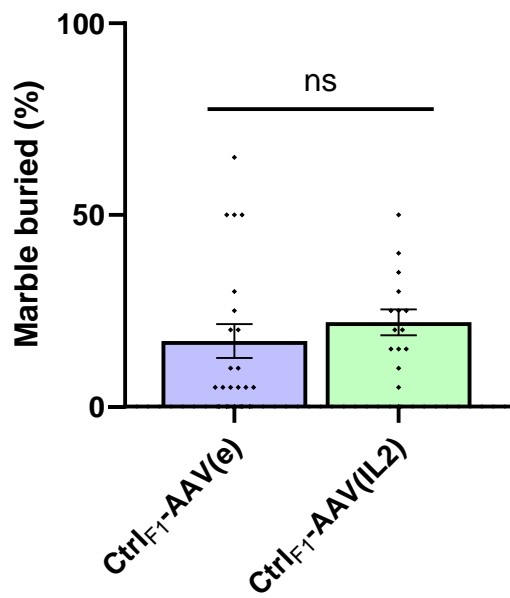

B

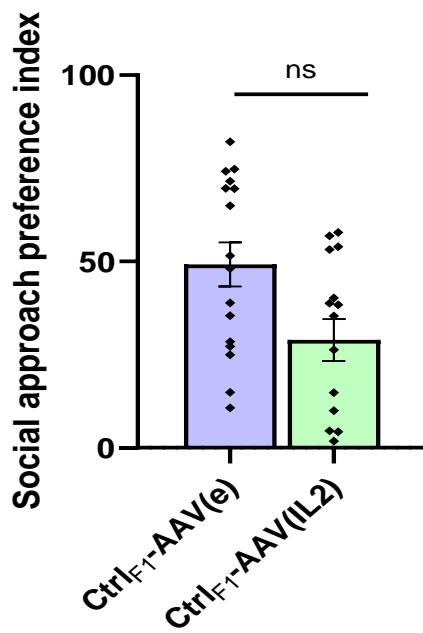

C

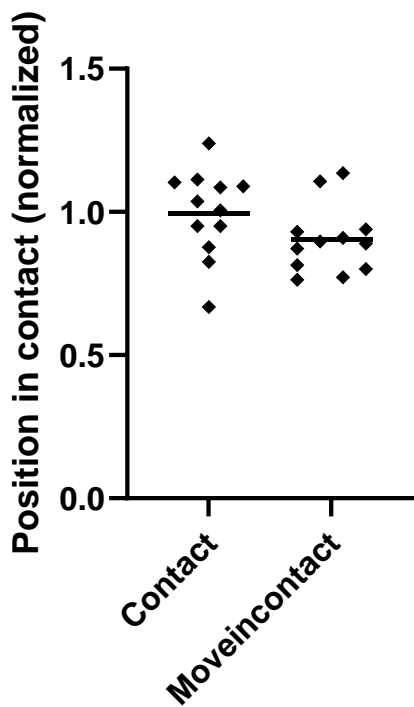

D

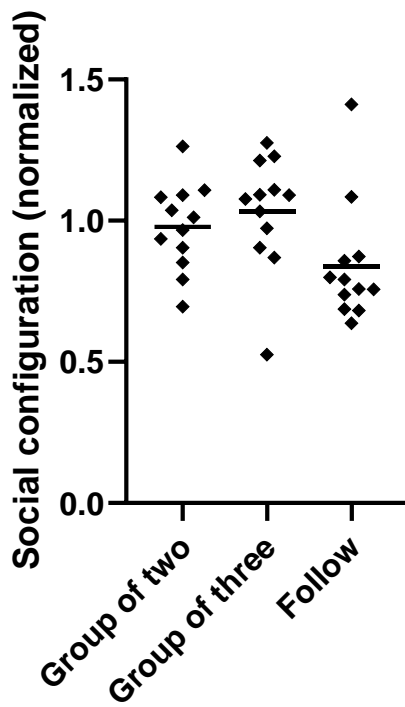

E

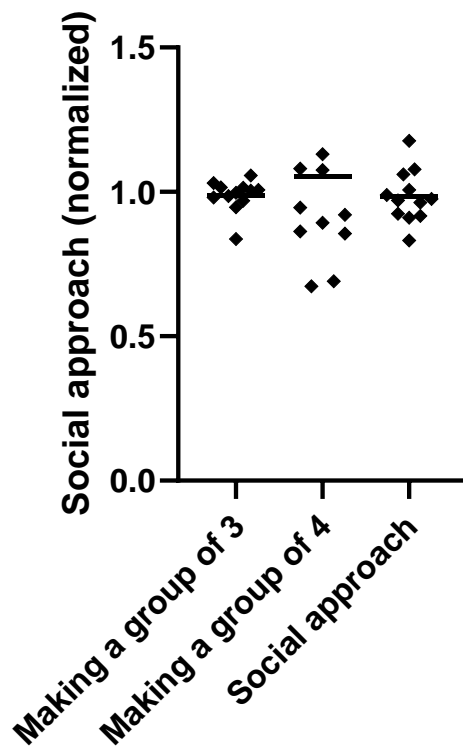

Supplement: Supplementary file 6 [file f414b24d4d553453a31b20ec.pdf]
